# Supplementary material for: The Impact of Lower Extremity Skeletal Muscle Atrophy and Myosteatosis on Revascularization Outcomes in Patients with Peripheral Arterial Disease
Source: MDPI journal article supplement (doi:10.3390/jcm10173963), 2021-08-31
Supplement: s1 [file s1]

## Supplementary Tables

**Supplementary Table 1.** Univariable Cox proportional hazards model for reintervention free survival in PAD patients

| Variables                | Univariable analysis Model 1 |             |              |
|--------------------------|------------------------------|-------------|--------------|
|                          | HR                           | 95% CI      | p value      |
| Muscle atrophy Legs      | 0.889                        | 0.696-1.136 | 0.632        |
| Myosteatosi Legs         | 1.163                        | 0.927-1.458 | 0.506        |
| Age (y)                  | 0.986                        | 0.977-0.996 | 0.162        |
| BMI (kg/m <sup>2</sup> ) | 1.030                        | 0.983-1.079 | 0.215        |
| Smoking                  | 0.945                        | 0.591-1.512 | 0.813        |
| Type of intervention     |                              |             |              |
| Surgical                 | Ref                          |             |              |
| Endovascular             | 1.003                        | 0.787-1.280 | 0.989        |
| Hybrid                   | 1.151                        | 0.782-1.695 | 0.705        |
| Fontaine class           |                              |             |              |
| IIa & IIb                | Ref                          |             |              |
| III & IV                 | 1.584                        | 1.006-2.496 | <b>0.047</b> |
| Hypertension             | 0.964                        | 0.766-1.213 | 0.873        |
| Hypercholesterolemia     | 1.146                        | 0.847-1.550 | 0.648        |
| Coronary artery disease  | 1.118                        | 0.893-1.400 | 0.620        |
| Haemodialysis            | 2.247                        | 0.904-5.585 | 0.081        |
| Ischemic stroke          | 1.058                        | 0.693-1.617 | 0.894        |

CI = confidence interval, BMI = body mass index.

**Supplementary Table 2.** Multivariable Cox proportional hazards model for muscle atrophy and myosteatosi for reintervention free survival in PAD patients

| Variables                | Multivariable analysis Model 2<br>muscle atrophy |             |         | Multivariable analysis Model 2<br>myosteatosi |             |         |
|--------------------------|--------------------------------------------------|-------------|---------|-----------------------------------------------|-------------|---------|
|                          | HR                                               | 95% CI      | p value | HR                                            | 95% CI      | p value |
| Muscle atrophy legs      | 1.044                                            | 0.630-1.730 | 0.870   |                                               |             |         |
| Myosteatosi legs         |                                                  |             |         | 1.269                                         | 0.794-2.029 | 0.320   |
| Age (y)                  | 0.984                                            | 0.964-1.004 | 0.117   | 0.981                                         | 0.961-1.002 | 0.076   |
| BMI (kg/m <sup>2</sup> ) | 1.032                                            | 0.982-1.084 | 0.218   | 1.028                                         | 0.981-1.078 | 0.247   |
| Smoking                  | 0.893                                            | 0.545-1.462 | 0.653   | 0.900                                         | 0.550-1.474 | 0.675   |

Model 2 = Controlled for patient-related factors (i.e., age, BMI, and smoking status). CI = confidence interval. *P* value stated in bold indicates statistical significance of <0.05.

**Supplementary Table 3.** Multivariable Cox proportional hazards model for muscle atrophy and myosteatosi for reintervention free survival in PAD patients

| Variables                | Multivariable analysis Model 3<br>muscle atrophy |             |              | Multivariable analysis Model 3<br>myosteatosi |             |              |
|--------------------------|--------------------------------------------------|-------------|--------------|-----------------------------------------------|-------------|--------------|
|                          | HR                                               | 95% CI      | p-value      | HR                                            | 95% CI      | p value      |
| Muscle atrophy legs      | 0.922                                            | 0.546-1.555 | 0.760        |                                               |             |              |
| Myosteatosi legs         |                                                  |             |              | 1.134                                         | 0.701-1.833 | 0.608        |
| Age (y)                  | 0.980                                            | 0.960-1.000 | <b>0.049</b> | 0.978                                         | 0.958-0.999 | <b>0.037</b> |
| BMI (kg/m <sup>2</sup> ) | 1.032                                            | 0.981-1.085 | 0.223        | 1.033                                         | 0.986-1.083 | 0.173        |
| Smoking                  | 0.848                                            | 0.517-1.392 | 0.514        | 0.855                                         | 0.522-1.402 | 0.535        |
| Type of intervention     |                                                  |             |              |                                               |             |              |

|                |              |       |             |              |       |             |              |
|----------------|--------------|-------|-------------|--------------|-------|-------------|--------------|
|                | Surgical     | Ref   |             |              | Ref   |             |              |
|                | Endovascular | 1.007 | 0.623-1.627 | 0.979        | 1.005 | 0.622-1.625 | 0.983        |
|                | Hybrid       | 1.120 | 0.536-2.341 | 0.764        | 1.128 | 0.540-2.357 | 0.749        |
| Fontaine class |              |       |             |              |       |             |              |
|                | Ila & IIb    | Ref   |             |              | Ref   |             |              |
|                | III & IV     | 1.766 | 1.097-2.843 | <b>0.019</b> | 1.703 | 1.056-2.749 | <b>0.029</b> |

Model 3 = Controlled for both patient-related and disease-related factors (i.e., type of intervention and Fontaine class). CI = confidence interval. *p* value stated in bold indicates statistical significance of <0.05.

**Supplementary Table 4.** Univariable Cox proportional hazards model for amputation free survival in PAD patients

| Variables                | Univariable analysis Model 1 |              |                  |
|--------------------------|------------------------------|--------------|------------------|
|                          | HR                           | 95% CI       | <i>p</i> -value  |
| Muscle atrophy Legs      | 2.970                        | 1.824-4.835  | <b>&lt;0.001</b> |
| Myosteatosi Legs         | 2.641                        | 1.616-4.318  | <b>&lt;0.001</b> |
| Age (y)                  | 1.002                        | 0.979-1.024  | 0.893            |
| Sex                      |                              |              |                  |
| Male                     | Ref                          |              |                  |
| Female                   | 1.185                        | 0.728-1.927  | 0.495            |
| BMI (kg/m <sup>2</sup> ) | 1.008                        | 0.957-1.062  | 0.765            |
| Smoking                  | 0.892                        | 0.581-1.603  | 0.965            |
| Type 2 diabetes          | 1.806                        | 1.108-2.943  | <b>0.018</b>     |
| COPD                     | 0.539                        | 0.282-1.029  | 0.061            |
| Type of intervention     |                              |              |                  |
| Surgical                 | Ref                          |              |                  |
| Endovascular             | 0.760                        | 0.440-1.311  | 0.323            |
| Hybrid                   | 1.383                        | 0.683-2.802  | 0.368            |
| Fontaine class           |                              |              |                  |
| Ila & IIb                | Ref                          |              |                  |
| III & IV                 | 19.744                       | 6.225-62.625 | <b>&lt;0.001</b> |
| Hypertension             | 0.803                        | 0.489-1.321  | 0.388            |
| Hypercholesterolemia     | 0.638                        | 0.364-1.121  | 0.118            |
| Coronary artery disease  | 1.093                        | 0.664-1.797  | 0.727            |
| Hemodialysis             | 7.294                        | 3.779-14.078 | <b>&lt;0.001</b> |
| Ischemic stroke          | 1.033                        | 0.415-2.570  | 0.945            |

CI = confidence interval, BMI = body mass index, COPD = chronic obstructive pulmonary disease. *p* value stated in bold indicates statistical significance of <0.05.

**Supplementary Table 5.** Multivariable Cox proportional hazards model for muscle atrophy and myosteatosi for amputation free survival in PAD patients

| Variables           | Multivariable analysis Model 2<br>muscle atrophy |             |                  | Multivariable analysis Model 2<br>myosteatosi |             |                  |
|---------------------|--------------------------------------------------|-------------|------------------|-----------------------------------------------|-------------|------------------|
|                     | HR                                               | 95% CI      | <i>p</i> -value  | HR                                            | 95% CI      | <i>p</i> value   |
| Muscle atrophy legs | 3.803                                            | 2.470-5.857 | <b>&lt;0.001</b> |                                               |             |                  |
| Myosteatosi legs    |                                                  |             |                  | 3.085                                         | 1.826-5.210 | <b>&lt;0.001</b> |
| Age (y)             | 0.992                                            | 0.971-1.014 | 0.469            | 0.990                                         | 0.967-1.014 | 0.414            |
| Sex                 |                                                  |             |                  |                                               |             |                  |
| Male                | Ref                                              |             |                  | Ref                                           |             |                  |

|                          |       |             |              |       |             |              |
|--------------------------|-------|-------------|--------------|-------|-------------|--------------|
| Female                   | 1.221 | 0.749-1.991 | 0.424        | 1.133 | 0.695-1.849 | 0.617        |
| BMI (kg/m <sup>2</sup> ) | 1.047 | 0.989-1.107 | 0.115        | 0.987 | 0.937-1.039 | 0.607        |
| Smoking                  | 1.041 | 0.602-1.802 | 0.885        | 1.243 | 0.706-2.190 | 0.451        |
| Type 2 diabetes          | 1.448 | 0.892-2.351 | 0.162        | 1.720 | 1.036-2.856 | <b>0.036</b> |
| COPD                     | 0.463 | 0.239-0.897 | <b>0.023</b> | 0.426 | 0.219-0.830 | <b>0.012</b> |

Model 2 = Controlled for patient-related factors (i.e., age, BMI, gender, and smoking status, DM type 2, and COPD). CI = confidence interval, BMI = body mass index, COPD = chronic obstructive pulmonary disease. *p* value stated in bold indicates statistical significance of <0.05.

**Supplementary Table 6.** Multivariable Cox proportional hazards model for muscle atrophy and myosteatorsis for amputation free survival in PAD patients

| Variables                | Multivariable analysis Model 3<br>muscle atrophy |              |                  | Multivariable analysis Model 3<br>myosteatorsis |              |                  |
|--------------------------|--------------------------------------------------|--------------|------------------|-------------------------------------------------|--------------|------------------|
|                          | HR                                               | 95% CI       | <i>p</i> value   | HR                                              | 95% CI       | <i>p</i> value   |
| Muscle atrophy legs      | 2.627                                            | 1.496-4.612  | <b>0.001</b>     |                                                 |              |                  |
| Myosteatorsis legs       |                                                  |              |                  | 2.191                                           | 1.278-3.759  | <b>0.004</b>     |
| Age (y)                  | 0.979                                            | 0.957-1.001  | 0.067            | 0.977                                           | 0.953-1.001  | 0.059            |
| Gender                   |                                                  |              |                  |                                                 |              |                  |
| Male                     | Ref                                              |              |                  | Ref                                             |              |                  |
| Female                   | 1.096                                            | 0.668-1.800  | 0.716            | 0.984                                           | 0.597-1.621  | 0.949            |
| BMI (kg/m <sup>2</sup> ) | 1.053                                            | 0.994-1.116  | 0.077            | 1.009                                           | 0.958-1.064  | 0.732            |
| Smoking                  | 1.016                                            | 0.580-1.779  | 0.957            | 1.125                                           | 0.633-1.999  | 0.688            |
| Type 2 diabetes          | 1.448                                            | 0.834-2.515  | 0.189            | 1.778                                           | 1.047-3.018  | <b>0.033</b>     |
| COPD                     | 0.436                                            | 0.223-0.853  | <b>0.015</b>     | 0.414                                           | 0.210-0.816  | <b>0.011</b>     |
| Type of intervention     |                                                  |              |                  |                                                 |              |                  |
| Surgical                 | Ref                                              |              |                  | Ref                                             |              |                  |
| Endovascular             | 0.856                                            | 0.484-1.513  | 0.592            | 0.839                                           | 0.477-1.475  | 0.542            |
| Hybrid                   | 1.129                                            | 0.552-2.309  | 0.740            | 1.109                                           | 0.544-2.262  | 0.775            |
| Fontaine class           |                                                  |              |                  |                                                 |              |                  |
| IIa & IIb                | Ref                                              |              |                  | Ref                                             |              |                  |
| III & IV                 | 18.597                                           | 5.727-60.386 | <b>&lt;0.001</b> | 19.152                                          | 5.889-62.277 | <b>&lt;0.001</b> |

Model 3 = Controlled for both patient-related and disease-related factors (i.e., type of intervention and Fontaine class). CI = confidence interval, BMI = body mass index, COPD = chronic obstructive pulmonary disease. *p* value stated in bold indicates statistical significance of <0.05.
